# Supplementary material
Source: publisher figshare collection journal article supplement (https://plos.figshare.com/articles/dataset/_/6732869)
Supplement: Supplementary file [file pone.0200101.s001.pdf › pone.0200101.s001.pdf]

### Complete Search on açaí in databases

| Full Search |                          |                      |        |                |
|-------------|--------------------------|----------------------|--------|----------------|
|             | Pubmed                   | Medline-Bireme       | SciELO | Lilacs         |
| 1           | Brasil A, 2017           | Brasil A, 2017       |        | Silva DF, 2013 |
| 2           | Brasil A, 2017           | Brito C, 2016        |        | Silva DF, 2013 |
| 3           | Brito C, 2017            | Brito C, 2017        |        |                |
| 4           | Brito C, 2017            | Caiado RR, 2017      |        |                |
| 5           | Brito C, 2016            | Dias MM, 2014        |        |                |
| 6           | Brito C, 2016            | Felzenszwalb I, 2013 |        |                |
| 7           | Caiado RR, 2017          | Kowar M, 2015        |        |                |
| 8           | Caiado RR, 2017          | Marques ES, 2016     |        |                |
| 9           | Choi YJ, 2017            | Schauss AG, 2010     |        |                |
| 10          | de Souza Machado F, 2015 | Spada PD, 2008       |        |                |
| 11          | Dias MM, 2014            |                      |        |                |
| 12          | Dias MM, 2014            |                      |        |                |
| 13          | Felzenszwalb I, 2013     |                      |        |                |
| 14          | Felzenszwalb I, 2013     |                      |        |                |
| 15          | Fragoso MF, 2012         |                      |        |                |
| 16          | Fragoso MF, 2013         |                      |        |                |
| 17          | Fragoso MF, 2013         |                      |        |                |
| 18          | Fragoso MF, 2013         |                      |        |                |
| 19          | Fragoso MF, 2013         |                      |        |                |
| 20          | Freitas DDS, 2017        |                      |        |                |
| 21          | Freitas DDS, 2017        |                      |        |                |
| 22          | Kim YS, 2013             |                      |        |                |
| 23          | Kim YS, 2013             |                      |        |                |
| 24          | Kinghorn AD, 2011        |                      |        |                |
| 25          | Kinghorn AD, 2011        |                      |        |                |
| 26          | Leba LJ, 2016            |                      |        |                |
| 27          | Machado AK, 2016         |                      |        |                |
| 28          | Machado AK, 2016         |                      |        |                |
| 29          | Marques ES, 2017         |                      |        |                |
| 30          | Marques ES, 2017         |                      |        |                |
| 31          | Marques ES, 2016         |                      |        |                |
| 32          | Marques ES, 2016         |                      |        |                |
| 33          | Monge Fuentes V, 2017    |                      |        |                |
| 34          | Monge Fuentes V, 2017    |                      |        |                |
| 35          | Nascimento VH, 2016      |                      |        |                |
| 36          | Nascimento VH, 2016      |                      |        |                |
| 37          | Nascimento VH, 2016      |                      |        |                |
| 38          | Nascimento VH, 2016      |                      |        |                |
| 39          | Ribeiro JC, 2010         |                      |        |                |
| 40          | Ribeiro JC, 2010         |                      |        |                |
| 41          | Schauss AG, 2010         |                      |        |                |
| 42          | Schauss AG, 2010         |                      |        |                |
| 43          | Schreckinger ME, 2010    |                      |        |                |

|    |                  |  |  |  |
|----|------------------|--|--|--|
| 44 | Silva DF, 2014   |  |  |  |
| 45 | Silva DF, 2014   |  |  |  |
| 46 | Stoner GD, 2010  |  |  |  |
| 47 | Vrillas MA, 2012 |  |  |  |
| 48 | Wong DY, 2013    |  |  |  |

| Duplicates Articles |                       |                      |        |                |
|---------------------|-----------------------|----------------------|--------|----------------|
|                     | Pubmed                | Medline-Bireme       | SciELO | Lilacs         |
| 1                   | Brasil A, 2017        | Brasil A, 2017       |        | Silva DF, 2013 |
| 2                   | Brito C, 2017         | Brito C, 2016        |        |                |
| 3                   | Brito C, 2016         | Brito C, 2017        |        |                |
| 4                   | Caiado RR, 2017       | Caiado RR, 2017      |        |                |
| 5                   | Dias MM, 2014         | Dias MM, 2014        |        |                |
| 6                   | Felzenszwalb I, 2013  | Felzenszwalb I, 2013 |        |                |
| 7                   | Fragoso MF, 2013      | Marques ES, 2016     |        |                |
| 8                   | Fragoso MF, 2013      | Schauss AG, 2010     |        |                |
| 9                   | Fragoso MF, 2013      |                      |        |                |
| 10                  | Freitas DDS, 2017     |                      |        |                |
| 11                  | Kim YS, 2013          |                      |        |                |
| 12                  | Kinghorn AD, 2011     |                      |        |                |
| 13                  | Machado AK, 2016      |                      |        |                |
| 14                  | Marques ES, 2017      |                      |        |                |
| 15                  | Marques ES, 2016      |                      |        |                |
| 16                  | Monge Fuentes V, 2017 |                      |        |                |
| 17                  | Nascimento VH, 2016   |                      |        |                |
| 18                  | Nascimento VH, 2016   |                      |        |                |
| 19                  | Nascimento VH, 2016   |                      |        |                |
| 20                  | Ribeiro JC, 2010      |                      |        |                |
| 21                  | Schauss AG, 2010      |                      |        |                |
| 22                  | Silva DF, 2014        |                      |        |                |

| Articles after duplicates removed |                          |                |        |                |
|-----------------------------------|--------------------------|----------------|--------|----------------|
|                                   | Pubmed                   | Medline-Bireme | SciELO | Lilacs         |
| 1                                 | Brasil A, 2017           | Kowar M, 2015  |        | Silva DF, 2013 |
| 2                                 | Brito C, 2017            | Spada PD, 2008 |        |                |
| 3                                 | Brito C, 2016            |                |        |                |
| 4                                 | Caiado RR, 2017          |                |        |                |
| 5                                 | Choi YJ, 2017            |                |        |                |
| 6                                 | de Souza Machado F, 2015 |                |        |                |
| 7                                 | Dias MM, 2014            |                |        |                |
| 8                                 | Felzenszwalb I, 2013     |                |        |                |
| 9                                 | Fragoso MF, 2012         |                |        |                |
| 10                                | Fragoso MF, 2013         |                |        |                |
| 11                                | Freitas DDS, 2017        |                |        |                |

|    |                       |  |  |  |
|----|-----------------------|--|--|--|
| 12 | Kim YS, 2013          |  |  |  |
| 13 | Kinghorn AD, 2011     |  |  |  |
| 14 | Leba LJ, 2016         |  |  |  |
| 15 | Machado AK, 2016      |  |  |  |
| 16 | Marques ES, 2017      |  |  |  |
| 17 | Marques ES, 2016      |  |  |  |
| 18 | Monge Fuentes V, 2017 |  |  |  |
| 19 | Nascimento VH, 2016   |  |  |  |
| 20 | Ribeiro JC, 2010      |  |  |  |
| 21 | Schauss AG, 2010      |  |  |  |
| 22 | Schreckinger ME, 2010 |  |  |  |
| 23 | Silva DF, 2014        |  |  |  |
| 24 | Stoner GD, 2010       |  |  |  |
| 25 | Vrillas MA, 2012      |  |  |  |
| 26 | Wong DY, 2013         |  |  |  |

| Included Articles |                        |                            |
|-------------------|------------------------|----------------------------|
|                   | Treatment Animal Model | Toxicological Animal Model |
| 1                 | Choi YJ, 2017          | Ribeiro JC, 2010           |
| 2                 | Fragoso MF, 2012       | Schauss AG, 2010           |
| 3                 | Fragoso MF, 2013       | Marques ES, 2016           |
| 4                 | Nascimento VH, 2016    |                            |
| 5                 | Monge Fuentes V, 2017  |                            |
| 6                 | Stoner GD, 2010        |                            |

| Excluded Articles |                          |                |        |                |
|-------------------|--------------------------|----------------|--------|----------------|
|                   | Pubmed                   | Medline-Bireme | SciELO | Lilacs         |
| 1                 | Brasil A, 2017           | Kowar M, 2015  |        | Silva DF, 2013 |
| 2                 | Brito C, 2017            | Spada PD, 2008 |        |                |
| 3                 | Brito C, 2016            |                |        |                |
| 4                 | Caiado RR, 2017          |                |        |                |
| 5                 | de Souza Machado F, 2015 |                |        |                |
| 6                 | Dias MM, 2014            |                |        |                |
| 7                 | Felzenszwalb I, 2013     |                |        |                |
| 8                 | Freitas DDS, 2017        |                |        |                |
| 9                 | Kim YS, 2013             |                |        |                |
| 10                | Kinghorn AD, 2011        |                |        |                |
| 11                | Leba LJ, 2016            |                |        |                |
| 12                | Machado AK, 2016         |                |        |                |
| 13                | Marques ES, 2017         |                |        |                |
| 14                | Schreckinger ME, 2010    |                |        |                |
| 15                | Silva DF, 2014           |                |        |                |
| 16                | Vrillas MA, 2012         |                |        |                |
| 17                | Wong DY, 2013            |                |        |                |

| Reason for excluded the articles |                       |                          |                         |                                       |
|----------------------------------|-----------------------|--------------------------|-------------------------|---------------------------------------|
|                                  | Reviews               | Not related to subject   | <i>In vitro</i> studies | Do not used the order <i>Rodentia</i> |
| 1                                | Kinghorn AD, 2011     | Brasil A, 2017           | Brito C, 2017           | Caiado RR, 2017                       |
| 2                                | Schreckinger ME, 2010 | de Souza Machado F, 2015 | Brito C, 2016           | Vrillas MA, 2012                      |
| 3                                |                       | Felzenszwalb I, 2013     | Dias MM, 2014           |                                       |
| 4                                |                       | Kim YS, 2013             | Freitas DDS, 2017       |                                       |
| 5                                |                       | Kowar M, 2015            | Machado AK, 2016        |                                       |
| 6                                |                       | Leba LJ, 2016            | Marques ES, 2017        |                                       |
| 7                                |                       |                          | Wong DY, 2013           |                                       |
| 8                                |                       |                          | Silva DF, 2014          |                                       |
| 9                                |                       |                          | Silva DF, 2013          |                                       |
| 10                               |                       |                          | Spada PD, 2008          |                                       |
